# Supplementary material for: Selective hydrolysis of cellulose into glucose over solid acid catalysts
Source: Royal Society of Chemistry journal article supplement (doi:10.1039/b808471h), 2008-01-01
Supplement: b808471h.pdf [file b808471h.pdf]

H-ZSM5 (45)

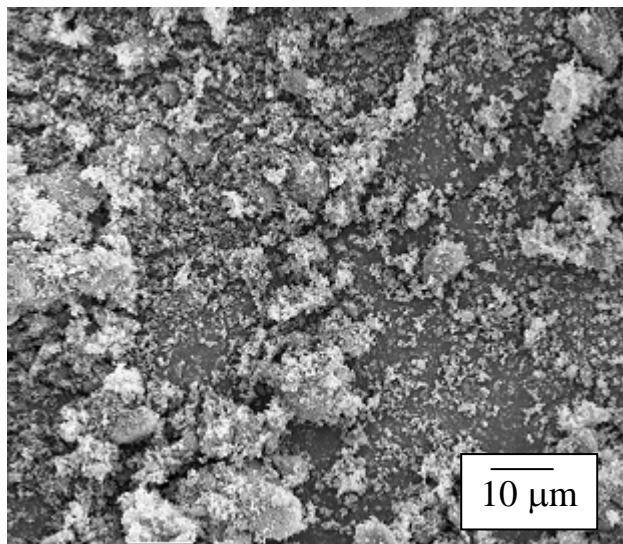

H-mordenite (10)

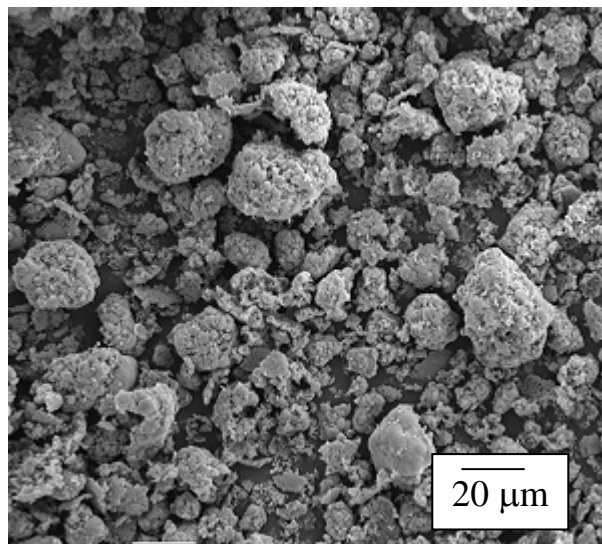

H-beta (13)

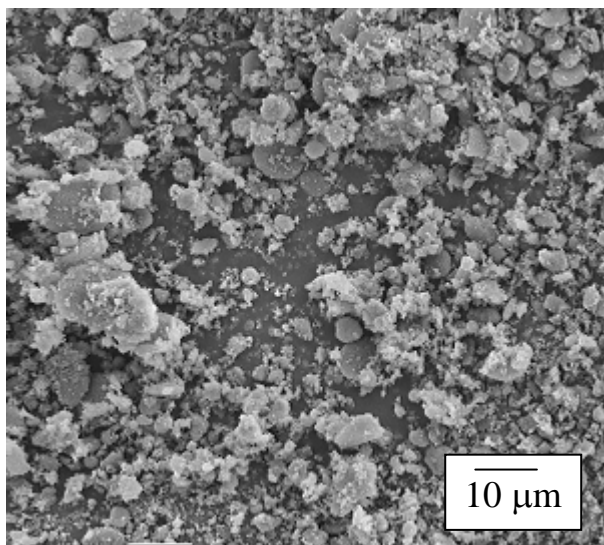

H-beta (75)

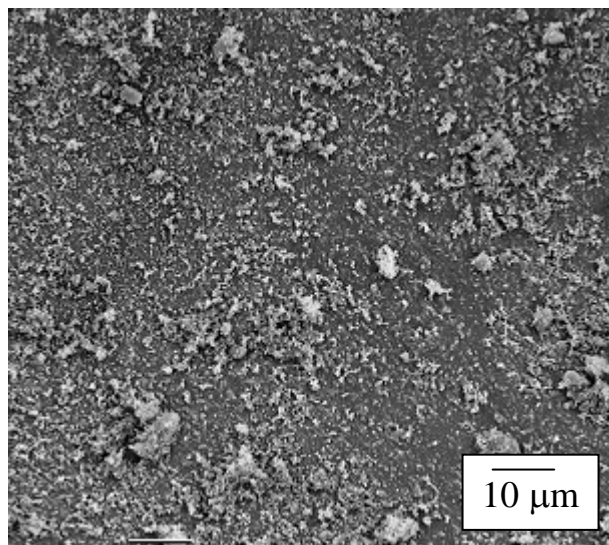

**Figure S1.** SEM images of the tested catalysts.

AC

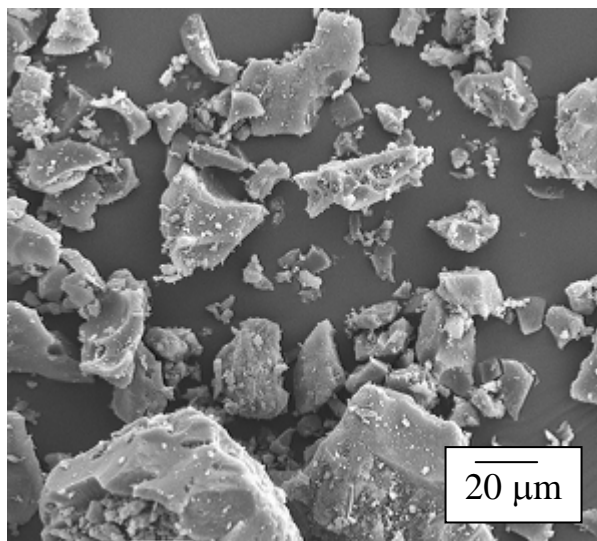

AC-SO<sub>3</sub>H

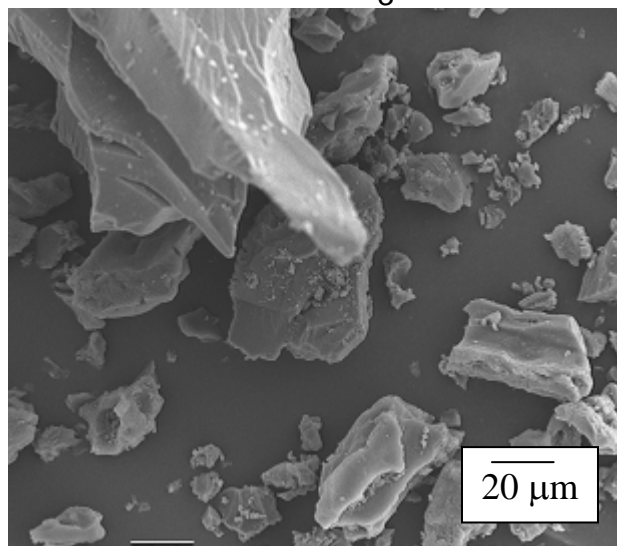

Sulfated zirconia

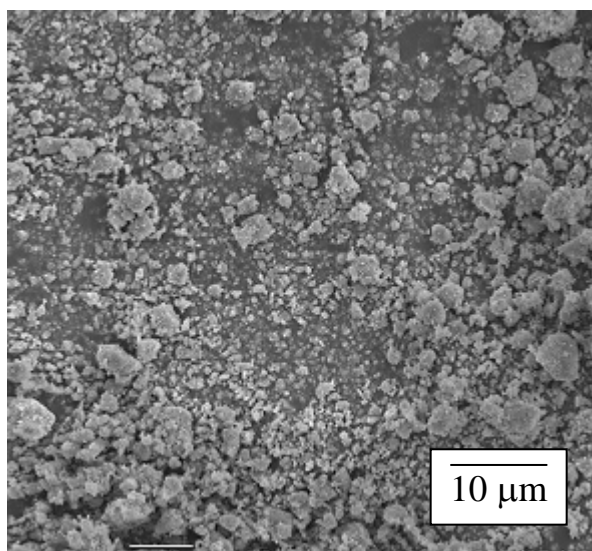

**Figure S1.** SEM images (continuation).

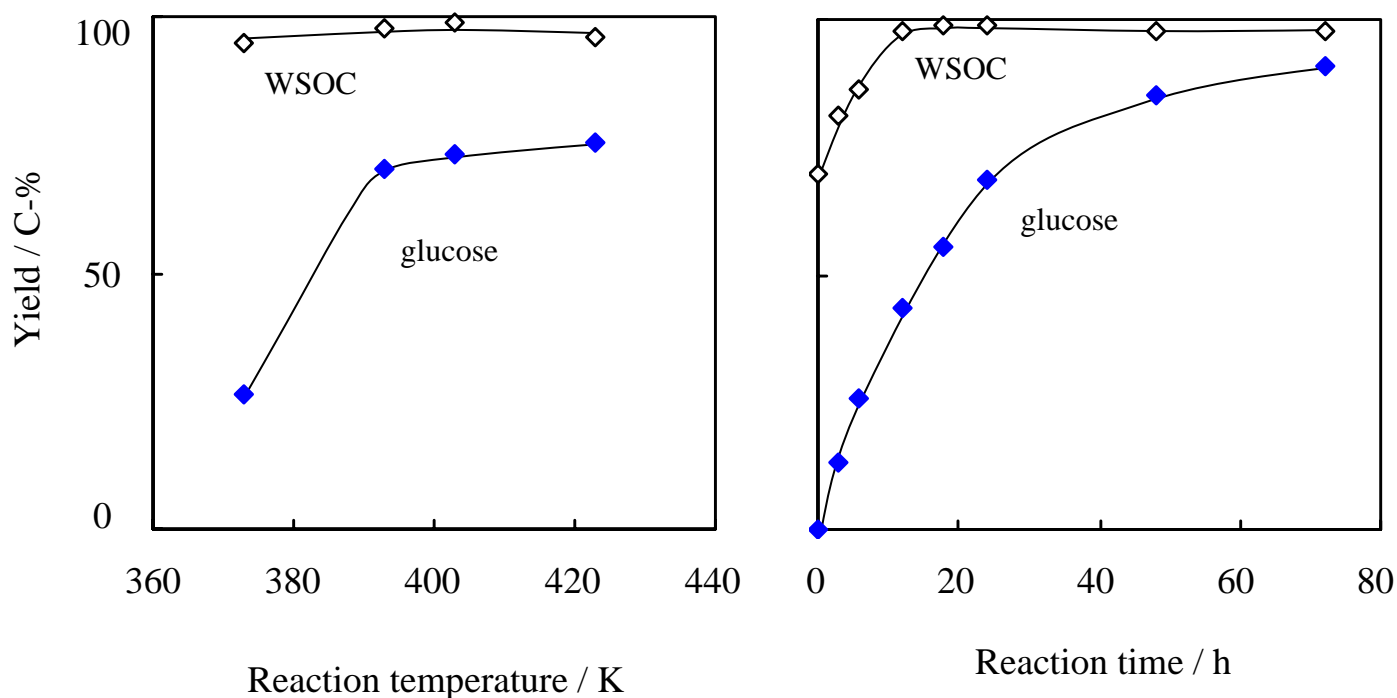

**Figure S2.** Effect of reaction temperature (a) and reaction time (b) on the starch hydrolysis using the AC-SO<sub>3</sub>H catalyst. Reaction conditions; reaction time 24 h (a), reaction temperature 393 K (b). catalyst 50 mg, starch 45 mg, distilled water 5 mL, agitation.
